1 **Fast initial Covid-19 response means greater caution may be needed later**

2 Joël J.-M. Hirschi\*

3 \**Corresponding author address:* National Oceanography Centre, Southampton, SO14 3ZH, United

4 Kingdom

5 E-mail: joel.hirschi@noc.ac.uk

## ABSTRACT

6     **Background:** As the Covid-19 pandemic unfolds it is becoming increas-  
7     ingly clear that the strength of the first wave of the epidemic varies signifi-  
8     cantly between countries. In this study a simple numerical model is used to  
9     illustrate the impact the timing of initial measures against Covid-19 has on  
10    the first wave of infection and possible implications this may have for the  
11    measures taken as the first wave is ebbing. The results highlight that delay-  
12    ing measures by 10 days is sufficient to largely account for the differences  
13    seen between countries such as the UK and Germany for the first wave of  
14    infections. A pronounced first wave means that a larger fraction of the total  
15    population will have been infected and is therefore likely to display immunity.  
16    Even if this fraction is far below the level needed for "herd immunity" the ef-  
17    fective reproduction factor  $R_e$  is decreased compared to a population that had  
18    no prior exposure to the virus. Even a small reduction in  $R_e$  can have major  
19    influence on the evolution of the epidemic after the first wave of infections.  
20    A large first wave means the resulting value for  $R_e$  will be lower than if the  
21    first wave was mild. Without either vaccine or effective treatment countries  
22    that experienced a small first wave should therefore relax measures at a slower  
23    pace than countries where the first wave was strong.

## 24 **1. introduction**

25 Around the Globe the Covid-19 (SARS-CoV2) pandemic is currently impacting the daily lives  
26 of billions of people. After being first reported in late 2019 in the Chinese Province of Hubei,  
27 the Covid-19 virus has spread to all continents and led to - at the time of writing - about 1/3 of  
28 the world population being subject to some form of "lockdown" rules. The paths chosen range  
29 from strict lockdowns with most people confined to their homes until the peak of the epidemic  
30 has been clearly passed (e.g. Hubei Province in China, South Korea, Italy, Spain) to more relaxed  
31 approaches where the emphasis is on minimising the impact on daily life (e.g. Sweden). Many  
32 nations are somewhere in the middle ground and have opted for various forms of "soft lockdown"  
33 where people - whilst strongly encouraged to stay at home - can leave their homes to buy groceries,  
34 to attend medical appointments or to exercise. In their approaches countries are weighing human  
35 cost and in particular the capacity of the health system to cope with a surge in the number of cases,  
36 against the cost of shutting or ramping down many sectors of the economy. Regardless of which  
37 aspect weighs more heavily on the decision-making, the adopted approaches all have in common  
38 that they want to prevent an uncontrolled, exponential increase in the number of people infected by  
39 the virus. Despite debates and in some instances tensions between scientific advice, government  
40 action and public perception there is consensus that an uncontrolled spread of the virus would  
41 come at an unacceptable human cost which would overwhelm even the best prepared and efficient  
42 health system.

43 All approaches that have been adopted include various forms of "social distancing" with the aim  
44 to reduce the number of direct contacts between people in order to lower the effective reproduction  
45 factor  $R_e$  (i.e. the number of people an infected person will infect on average) below a value of  
46 1. Current estimates for the reproduction factor  $R_0$  in a population that had no prior exposure to

47 Covid-19 are between 2 and 3 (e.g. Liu et al. 2020). This makes Covid-19 more contagious than  
48 for example flu viruses with  $R_0 \approx 1.3$  but less contagious than measles with  $R_0 \approx 15$  in previously  
49 unexposed populations. In addition to social distancing some countries also prescribe the use of  
50 face masks when people leave their home - an approach most widely seen in Asia (e.g. China,  
51 South Korea or Singapore) whereas in most western nations the choice of mask-wearing is left to  
52 the individual. Social distancing and/or wearing face masks is not a new approach but was widely  
53 used in earlier pandemics such as the Spanish flu in 1918/1919 (e.g. Martini et al. 2019; Reid et al.  
54 2001). Such measures are simple and have been shown to be effective in slowing the spread of  
55 viruses. These low-tech measures are still the backbone of our approach to slow down pandemics.  
56 However, new technologies like contact tracing using mobile phones are increasingly being tested  
57 to localise infection hotspots and inform targeted applications of measures.

58 As the Covid-19 pandemic unfolds with many countries having passed or are approaching the  
59 peak of the first wave we can observe marked differences in the number of cases and deaths in  
60 countries that are broadly comparable in terms of population size, health care systems and overall  
61 living standards. For example Germany had fewer deaths in the first wave than the UK despite  
62 having a larger population 83 vs 66 millions. Whilst it will be years until the full extent of the  
63 human and economic cost of the Covid-19 pandemic is known there are already lessons that can  
64 be learned - about the initial reactions and measures in future pandemics but also what to look  
65 out for as nations gradually emerge from the first wave of a pandemic. Analytical and numerical  
66 models can be powerful tools to understand the evolution of the pandemic so far and to test possible  
67 scenarios for the evolution of the pandemic in the coming months and years (e.g. Prem et al. 2020;  
68 Kucharski et al. 2020; Tsang et al. 2020). In this article a very simple model is used to illustrate  
69 the impact the timing of measures can have on the severity of the first wave of the pandemic and  
70 the consequences of a weak or a strong first wave once the lockdown rules are gradually relaxed.

71 The model is introduced in section 2, the results presented and discussed in sections 3 and 4 and  
72 conclusions are given in section 5.

## 73 2. Method

74 The following introduces the model that will be used to test scenarios in which the timing for  
75 the imposition and relaxation of measures during an epidemic is varied. The basic assumptions  
76 for the model are that without imposition of any measures (i.e. daily human contacts as usual) and  
77 in a population with no prior exposure to the virus the reproduction rate  $R_0$  is assumed to be 2.5.  
78  $R_0 = 2.5$  is at the lower end of the range of estimates for  $R_0$  for Covid-19 (e.g. Liu et al. 2020; Wu  
79 et al. 2020). An incubation time of 5 days is assumed i.e. within 5 days an infected person will on  
80 average infect 2.5 people.

81 The cumulative number of cases  $C$  is calculated according to

$$C(t_0) = 1, \tag{1}$$

$$C(t_1) = C(t_0)(1 + R_0), \tag{2}$$

...

$$C(t_n) = C(t_{n-1}) + (C(t_{n-1}) - C(t_{n-2})) \frac{R_0(t_n)(sP - C(t_{n-1}))}{sP}, \tag{3}$$

$$R_e(t_n) = \frac{R_0(t_n)(sP - C(t_{n-1}))}{sP}, \tag{4}$$

82 where  $P = 6.6 \times 10^7$  is the total population (similar to the UK),  $s = 0.6$  the fraction of the  
83 population that needs to have been infected for "herd immunity" to be reached. Since the average  
84 time between infection and first symptoms to show is about 5 days the assumption is made that  
85  $\Delta t = t_n - t_{n-1} = 5$  days.  $R_0$  is the reproduction rate in a population that had no prior exposure to  
86 the virus.  $R_e$  is the effective reproduction rate which accounts for the fact that, as the number of

87 infections in the population rise, the ability of the virus to infect people gradually decreases. This  
88 assumes that people who had the virus will be immune to re-infection and that "herd immunity"  
89 can be achieved. A linear relationship is assumed between  $C(t_n)$  and  $R_e$ . More elaborate functions  
90 could be used, but for to illustrate possible types of epidemic evolutions a linear relationship is  
91 sufficient.

92 The reproduction rate  $R_0(t_n)$  as used in equation 4 can be considered as indicative of the strin-  
93 gency of the measures taken to slow the spread of the virus. No measures means  $R_0(t_n) = 2.5$  and  
94  $R_0(t_n) = 0$  would refer to a situation where every infected person can be isolated before passing  
95 on the virus to anyone.

96 From  $C(t_n)$  the number of new cases per day is calculated according to:

$$\Delta C(t_n) = \frac{C(t_n) - C(t_{n-1})}{\Delta t} \quad (5)$$

97 The total number of fatalities  $F$  at time  $t_n$  is calculated according to:

$$F(t_n) = \frac{m}{4} \sum_{i=n-3}^n C(t_i), \quad n \geq 4, \quad (6)$$

98 It is not yet clear what the mortality rate  $m$  for Covid-19 is. Based on the number of cases reported  
99 by the World Health Organisation fatalities make about 6.5% of the total number of cases (WHO  
100 2020). It is estimated that the actual number of people who have been infected is at least one  
101 order of magnitude higher than the recorded number (e.g. Bendavid et al. 2020; Vardar 2020).  
102 Therefore, a mortality rate of  $m = 0.65\%$  is assumed here. The number of fatalities per day is:

$$\Delta F(t_n) = \frac{F(t_n) - F(t_{n-1})}{\Delta t} \quad (7)$$

103 *a. Experiments*

104 The goal of measures such as social distancing and lockdowns is to reduce  $R_0$  in order to get  $R_e$   
105 below a value of 1 before the number of infected people requiring treatment becomes too large.  
106 Figure 1 illustrates the evolution of  $C(t_n)$  if no measures are taken. In this case  $R_e$  solely reduces  
107 because the fraction of the population that has been infected increases. In this simple model it takes  
108 about 120 days for 60% of the population to have been infected, which here will be used as the  
109 threshold needed to reach herd immunity. From about day 80 onwards the effective reproduction  
110 rate  $R_e$  starts to decrease, reaching values close to zero after about 120 days. After that time 60%  
111 of the population (about 40 Mio people) would have been infected. With the assumed mortality  
112 rate of 0.65% this would result in 250000 fatalities in a population of 66 million.

113 In a set of experiments the model is used to illustrate the sensitivity of the long and short-term  
114 development of an epidemic to the timing of the initial measures (e.g. social distancing). Focus is  
115 on the first and potential second wave of infections (experiments A1, A2, B1, B2) and on possible  
116 long-term evolutions of the epidemic during the years following the first infection (C1, C2, D1,  
117 D2). The details for the experiments are listed in table 1. All experiments have in common that  
118 the first measures (reducing  $R_0$  from 2.5 to 1.1) start either on day 75 (A1, B1, C1, D1) or 65  
119 (A2, B2, C2, D2). "Lockdown" measures which reduce  $R_0$  from 1.1 to 0.85 start on day 80 for  
120 all experiments. The experiments (A, B, C, D) then differ on the timing and type of measures  
121 following the lockdown on day 80. All experiments are summarised in table 1.

122 To illustrate that the model can simulate realistic evolutions of the first wave of the Covid-  
123 19 epidemic the simulated number of fatalities is aligned with the numbers recorded in the UK  
124 and Germany. Model and observations are temporally aligned from the time onward when UK,  
125 German, and simulated total numbers of fatalities first reach or exceed 10. In the model this

126 threshold is reached after 60 days. Data for the UK and Germany are available from Worldometers  
127 (2020).

### 128 **3. Results**

129 The results shown in Figures 2 and 3 highlight the influence of timing of the first measures on  
130 the severity of the first wave of an epidemic. A difference of 10 days in the starting time of initial  
131 measures which reduce  $R_0$  from 2.5 to 1.1 (soft lockdown) is sufficient for the model to simulate  
132 evolutions of the number of deaths and death rate during the first wave which are comparable to the  
133 numbers recorded in the UK and Germany. If first measures are introduced on day 75 (experiments  
134 A1, B1, C1, D1) the maximum daily fatalities reach a maximum of just over 1000 deaths a day  
135 and by day 115 the cumulative fatalities exceed 30000. In contrast if first measures start on day 65  
136 (experiments A2, B2, C2, D2) the model simulates a peak in daily fatalities of just under 250 and  
137 a total number of fatalities of under 8000 - even though the lockdown starts on day 80 ( $R_0 = 0.85$ )  
138 in all experiments.

139 Except for experiments B1 and B2 where a long lockdown allows the number of cases to fall to  
140 zero, the lockdown measures are relaxed on day 115. In experiments A1 and A2 there is a further  
141 relaxing of measures on day 165 which allows a second wave to develop. This second wave is  
142 much more pronounced for experiment A2 ("German" case) than for experiment A1 ("UK" case).  
143 The respective peaks for daily fatalities are about 750 and 300. By day 280 a similar number  
144 of cumulative fatalities ( $\approx 60000$ ) is reached in both cases. The reason for the difference in the  
145 amplitude of the second wave is the effective transmission rate  $R_e$ . In A1 the simulated total  
146 number of cases  $C$  is just under 6 million people by the end of the lockdown (i.e. just under 10%  
147 of the total population). However, less than two million people (around 3% of the total population)  
148 would have been infected by the end of the lockdown in A2. These numbers are in the same order



149 as studies suggest for St Clara County in California (Bendavid et al. 2020) or Spain (Vardar 2020).  
150 This difference is significant when it comes to the effective transmission rate  $R_e$ : In neither of the  
151 two cases do we get close to the 60% level needed for herd immunity, however, the partial herd  
152 immunity is more pronounced in A1 than A2. When considering measures that aim at getting  $R_e$   
153 close to or ideally below a value of 1 having 3% or 9% of the population who went through the  
154 infection can be enough to get an effective reproduction rate which is just over or just under the  
155 critical threshold of 1. This can be clearly seen for experiments A1 and A2 (Figure 2): After the  
156 lockdown ends on day 115,  $R_e$  is below 1 for experiment A1 until a further relaxation allows  $R_0$   
157 and  $R_e$  to increase to 1.7 and about 1.4 in A1 whereas  $R_e$  increases to about 1.6 in A2 leading  
158 to a markedly stronger second wave. As mentioned in section 2  $R_0$  does change according to the  
159 assumed stringency of measures.

160 Experiments B1 and B2 (Figure 2) illustrate the evolution for a prolonged lockdown where  
161  $R_0 = 0.85$  until the number of daily cases  $\Delta C$  decreases to zero. This point is reached after about  
162 280 days in B1 and 340 days in B2. The numbers of fatalities plateau at about 37000 and 10000  
163 cases for B1 and B2, respectively.

164 Experiments C1 and C2 show the possible evolution for repeated loosening and tightening of  
165 the measures if daily fatalities  $\Delta F < 50$  and  $\Delta F > 75$ . Rather than a second wave the evolution  
166 is characterised by a number of "ripples" as measures are loosed or tightened. The number of  
167 fatalities gradually increases in both C1 and C2 but the slope flattens as the value of  $R_e$  decreases.  
168 This is more pronounced in C1: the stronger first wave leads to a larger difference between  $R_0$  and  
169  $R_e$ . As mentioned earlier the reproduction rate  $R_0$  can be regarded as a measure for how stringent  
170 measures are:  $R_0 = 2.5$  means that daily life is not restricted in any way (as shown in Figure 1  
171 this comes at a high human cost) and  $R_0 = 0$  means that there are no new infections. This is  
172 only possible if every infected person is completely isolated and is unrealistic once the epidemic is

173 spreading through the population. Experiments D1 and D2 illustrate the case where  $R_0$  is gradually  
174 allowed to increase starting from  $R_0 = 0.85$  during the lockdown to  $R_0 = 2.5$ . The rate of increase  
175 in  $R_0$  is determined by how large the tendency of  $R_e$  to fall is. The large first wave in D1 means  $R_0$   
176 can increase more quickly than in D2. In D1  $R_0 = 2.5$  after about 5 years whereas it takes about  
177 13 years in D2. For both D1 and D2 the number of fatalities is about 160000.

#### 178 **4. Discussion**

179 The cases shown in Figures 2 and 3 are very idealised. There is little doubt that if A2 ("German"  
180 case - Figure 2) were to start developing in the real world, measures would be tightened again  
181 before day 185 therefore avoiding the pronounced second wave. Given that  $F$  and  $\Delta F$  are recorded,  
182 authorities would be aware of this development and could act accordingly. Experiments B1 and  
183 B2 have the lowest number of fatalities but they would require a long lockdown. With lockdowns  
184 now being gradually eased this is not the path that most countries have chosen.

185 The scenarios C1 and C2 Figure 3 are more realistic as the extent of measures can adjust to  
186 changes in the number of recorded infections and deaths. Here we can see that after the first  
187 lockdown there are several phases where measures are tightened or loosened for short periods  
188 resulting in "ripples" in the number of infections and fatalities but avoiding a strong second wave.  
189 The thresholds of daily fatalities used to tighten or loosen measures are identical in C1 and C2.  
190 However, the effective reproduction factor  $R_e$  is consistently lower in C1 than in C2. In order to  
191 maintain the advantage of a clearly lower number of fatalities during the first wave the measures  
192 in C2 would need to be slightly more stringent than in C1 i.e.  $R_0$  would need to be consistently  
193 lower. However, if one assumes that a vaccine (or an effective treatment) becomes available within  
194 1 to 1.5 years C2 leads to a better outcome than C1. However, C1 would allow a daily life that is  
195 closer to "normal" than C2. By specifically targeting "hotspots" where infections flare up again

196 it may be possible to consistently maintain an overall value of  $R_e < 1$  without the need to tighten  
197 measures everywhere (the latter is the underlying assumption in all experiments). This may lead  
198 to evolutions of cases and fatalities which fall somewhere between experiments B1/2 and C1/2.

199 The scenarios illustrated in Figures 2 and 3 show that both the timing of the first measures as  
200 well as the choices made once the first wave is ebbing are crucial. Early action is the most effective  
201 way to reduce the amplitude of a first wave. Even delaying measures by a few days can result in  
202 many more lives being lost in that first wave. During the Covid-19 pandemic some governments  
203 chose not to act on initial warnings but only once it became obvious that the pandemic had taken  
204 a firm foothold. Here, it is also important to acknowledge the difficulty in knowing how far into  
205 a wave of infection a country actually is. Even in neighbouring countries the wave may be at an  
206 earlier or later stage and taking identical measures at the same time may lead to very different  
207 outcomes. If by the time the warnings come in the epidemic is more advanced than expected even  
208 swift action will not be sufficient to avoid a major first wave. On the other hand if the development  
209 of the wave lags expectations late action may still be sufficient to largely suppress the first wave.  
210 The large uncertainty regarding the stage of an epidemic means that a good (or bad) outcome can  
211 also be down to luck.

212 However, luck can no longer be a factor after the first wave. Assuming that the mortality rate  
213 and level of health care are broadly similar in different countries a large number of deaths in  
214 proportion to the total population is a strong indicator that a higher percentage of the population  
215 has been infected than if the number of deaths is low. The results shown in Figures 2 and 3 suggest  
216 that when gradually easing the lockdown, countries which had a mild first wave (e.g. Germany,  
217 Austria, Norway, South Korea) may opt for a slightly slower unwinding of measures than countries  
218 that experienced a major first wave. Experiencing a major first wave means that there is likely to  
219 be a higher "partial herd immunity" and that an effective reproduction rate  $R_e < 1$  can be achieved

220 with more relaxed measures than in countries where the partial herd immunity is lower. This effect  
221 can already be significant even if less than 10% of the total population have been infected (e.g.  
222 Figure 2). Current studies suggest that only 10% or less of the total number of infections have  
223 been detected and that less than 10% of the population has been infected (Bendavid et al. 2020;  
224 Vardar 2020).

225 At this point it is worth remembering that if one assumes a virus against which a vaccine is years  
226 away it is likely that the majority of the population will eventually be infected. Furthermore, "herd  
227 immunity" can only be achieved if people who had the infection develop long-term immunity.  
228 Whether this is the case is still subject of ongoing research (e.g. Prompetchara et al. 2020; Shi  
229 et al. 2020; Grifoni et al. 2020; Braun et al. 2020). The only time when eradication of a virus is  
230 possible without a vaccine is at the very onset of the outbreak provided the outbreak is localised  
231 and that infected people can be isolated until they are no longer infectious. However, the window  
232 of opportunity for this is short and by the time health services and authorities become aware of  
233 (or acknowledge) the situation it may already be too late. Since people with Covid-19 can be  
234 infectious before showing any symptoms (or indeed without developing systems) (e.g. Cascella  
235 et al. 2020; Tindale et al. 2020) and that much international travel carried on as normal in the early  
236 stages of the pandemic, containment was always going to be difficult.

## 237 **5. Conclusions**

238 A simple model has been used to simulate different scenarios for the Covid-19 epidemic in a  
239 population of the size of the UK. The findings suggest that:

- 240 • Timing of initial measures is key not just for the first wave of an epidemic but - in the ab-  
241 sence of either a vaccine or effective treatment - also for the longer term evolutions for years  
242 following the initial outbreak.

- 243 ● Shifting the implementation time of first measures by 10 days could explain differences in  
244 the number of recorded fatalities during the Covid-19 pandemic in countries such as the UK  
245 or Germany.
- 246 ● A large first wave means that easing of lockdown measures can occur faster than if the first  
247 wave was small. The reason for this is a lower effective reproduction factor after a strong first  
248 wave due to partial "herd immunity".
- 249 ● Relaxing measures too much after a small first wave risks cancelling out the advantage gained  
250 by the timely initial response to the pandemic.
- 251 ● Whether initial measures can largely suppress a the first wave of an epidemic is a combination  
252 of timely action and heeding advice as well as luck as at the time when first measures are  
253 taken it is difficult to know how far into the epidemic a country/region/town has progressed.

254 *Acknowledgments.* Comments by Bablu Sinha are gratefully acknowledged. This research re-  
255 ceived no specific grant from any funding agency, commercial or not-for-profit sectors. .

## 256 **References**

- 257 Bendavid, E., and Coauthors, 2020: COVID-19 Antibody Seroprevalence in Santa Clara County,  
258 California. *MedRxiv*.
- 259 Braun, J., and Coauthors, 2020: Presence of sars-cov-2 reactive t cells in covid-19 patients and  
260 healthy donors. *medRxiv*, doi:10.1101/2020.04.17.20061440, URL [https://www.medrxiv.org/](https://www.medrxiv.org/content/early/2020/04/22/2020.04.17.20061440)  
261 [https://www.medrxiv.org/content/early/2020/](https://www.medrxiv.org/content/early/2020/04/22/2020.04.17.20061440)  
262 [04/22/2020.04.17.20061440.full.pdf](https://www.medrxiv.org/content/early/2020/04/22/2020.04.17.20061440.full.pdf).
- 263 Cascella, M., M. Rajnik, A. Cuomo, S. C. Dulebohn, and R. Di Napoli, 2020: Features, evaluation  
264 and treatment coronavirus (COVID-19). *Statpearls [internet]*, StatPearls Publishing.

- 265 Grifoni, A., and Coauthors, 2020: Targets of T cell responses to SARS-CoV-  
266 2 coronavirus in humans with COVID-19 disease and unexposed individuals. *Cell*,  
267 <https://doi.org/10.1016/j.cell.2020.05.015>.
- 268 Kucharski, A. J., and Coauthors, 2020: Early dynamics of transmission and control of covid-19: a  
269 mathematical modelling study. *The lancet infectious diseases*.
- 270 Liu, Y., A. A. Gayle, A. Wilder-Smith, and J. Rocklöv, 2020: The reproductive number of COVID-  
271 19 is higher compared to SARS coronavirus. *Journal of travel medicine*.
- 272 Martini, M., V. Gazzaniga, N. L. Bragazzi, and I. Barberis, 2019: The Spanish Influenza Pandemic:  
273 a lesson from history 100 years after 1918. *Journal of Preventive Medicine and Hygiene*, **60 (1)**,  
274 E64.
- 275 Prem, K., and Coauthors, 2020: The effect of control strategies to reduce social mixing on out-  
276 comes of the covid-19 epidemic in wuhan, china: a modelling study. *The Lancet Public Health*.
- 277 Prompetchara, E., C. Ketloy, and T. Palaga, 2020: Immune responses in COVID-19 and potential  
278 vaccines: Lessons learned from SARS and MERS epidemic. *Asian Pac J Allergy Immunol*,  
279 **38 (1)**, 1–9.
- 280 Reid, A. H., J. K. Taubenberger, and T. G. Fanning, 2001: The 1918 Spanish influenza: integrating  
281 history and biology. *Microbes and infection*, **3 (1)**, 81–87.
- 282 Shi, Y., and Coauthors, 2020: Covid-19 infection: the perspectives on immune responses. Nature  
283 Publishing Group.
- 284 Tindale, L., and Coauthors, 2020: Transmission interval estimates suggest pre-symptomatic spread  
285 of COVID-19. *MedRxiv*.

- 286 Tsang, T. K., P. Wu, Y. Lin, E. H. Lau, G. M. Leung, and B. J. Cowling, 2020: Effect of changing  
287 case definitions for covid-19 on the epidemic curve and transmission parameters in mainland  
288 china: a modelling study. *The Lancet Public Health*.
- 289 Vardar, S., 2020: Estudio de seroprevalencia: sólo el 5% de los españoles tiene antic-  
290 uerpos frente al coronavirus. URL [https://www.elmundo.es/ciencia-y-salud/salud/2020/05/13/](https://www.elmundo.es/ciencia-y-salud/salud/2020/05/13/5ebc25ae21efa09e608b45f5.html)  
291 [5ebc25ae21efa09e608b45f5.html](https://www.elmundo.es/ciencia-y-salud/salud/2020/05/13/5ebc25ae21efa09e608b45f5.html), 13 May 2020, El Mundo.
- 292 WHO, 2020: WHO Coronavirus Disease (COVID-19) Dashboard. URL <https://covid19.who.int>,  
293 World Health Organisation.
- 294 Worldometers, 2020: Coronavirus. URL <https://www.worldometers.info/coronavirus/country/>  
295 [uk/https://www.worldometers.info/coronavirus/country/germany/](https://www.worldometers.info/coronavirus/country/germany/).
- 296 Wu, J. T., K. Leung, and G. M. Leung, 2020: Nowcasting and forecasting the potential domestic  
297 and international spread of the 2019-ncov outbreak originating in wuhan, china: a modelling  
298 study. *The Lancet*, **395 (10225)**, 689–697.

299 **LIST OF TABLES**

300 **Table 1.** Experiment overview. Measures start either on day 75 or 65 and lockdown  
301 starts on day 80 in all cases. Lockdown is either relaxed on day 115 (A1, A2,  
302 C1, C2, D1, D2 -  $R_0 = 1.1$  or  $1.05$ ) or completely relaxed ( $R_0 = 2.5$ ) if there  
303 have been no new daily new cases for 50 days (B1, B2). Further relaxation  
304 is either on day 165 (A1, A2); if daily fatalities  $\Delta F < 50$  (C1, C2); or if the  
305 effective reproduction rate  $R_e < 1$  (D1, D2). Measures are tightened again  
306 on day 185 (A1, A2 -  $R_0 = 1.1$ ) or if the daily fatalities  $\Delta F > 75$  (C1, C2 -  
307  $R_0 = 1.05$ ). . . . . 17



| Experiment | Start measures<br>[day] | Lockdown<br>[day]   | Relax measures<br>[day, $\Delta C$ ]                 | Relax further<br>[day, $\Delta F$ , $R_e$ ]                       | Tighten again<br>[day, $\Delta F$ ] |
|------------|-------------------------|---------------------|------------------------------------------------------|-------------------------------------------------------------------|-------------------------------------|
| A1         | 75 ( $R_0 = 1.1$ )      | 80 ( $R_0 = 0.85$ ) | 115 ( $R_0 = 1.1$ )                                  | 165 ( $R_0 = 1.7$ )                                               | 185 ( $R_0 = 1.1$ )                 |
| A2         | 65 ( $R_0 = 1.1$ )      | ”                   | ”                                                    | ”                                                                 | ”                                   |
| B1         | 75 ( $R_0 = 1.1$ )      | ”                   | If $\sum_{i=n-10}^n \Delta C(t_i) = 0$ : $R_0 = 2.5$ | —                                                                 | —                                   |
| B2         | 65 ( $R_0 = 1.1$ )      | ”                   | ”                                                    | —                                                                 | —                                   |
| C1         | 75 ( $R_0 = 1.1$ )      | ”                   | 115 ( $R_0 = 1.05$ )                                 | If $\Delta F < 50$ : $R_0 = 1.4$                                  | If $\Delta F > 75$ : $R_0 = 1.05$   |
| C2         | 65 ( $R_0 = 1.1$ )      | ”                   | ”                                                    | ”                                                                 | ”                                   |
| D1         | 75 ( $R_0 = 1.1$ )      | ”                   | ”                                                    | If $R_e(t_n) < 1$ :<br>$R_0(t_{n+1}) = R_0(t_n) + (1 - R_e(t_n))$ | —                                   |
| D2         | 65 ( $R_0 = 1.1$ )      | ”                   | ”                                                    | ”                                                                 | —                                   |

308 TABLE 1. Experiment overview. Measures start either on day 75 or 65 and lockdown starts on day 80 in  
309 all cases. Lockdown is either relaxed on day 115 (A1, A2, C1, C2, D1, D2 -  $R_0 = 1.1$  or 1.05) or completely  
310 relaxed ( $R_0 = 2.5$ ) if there have been no new daily new cases for 50 days (B1, B2). Further relaxation is either  
311 on day 165 (A1, A2); if daily fatalities  $\Delta F < 50$  (C1, C2); or if the effective reproduction rate  $R_e < 1$  (D1,  
312 D2). Measures are tightened again on day 185 (A1, A2 -  $R_0 = 1.1$ ) or if the daily fatalities  $\Delta F > 75$  (C1, C2 -  
313  $R_0 = 1.05$ ).

314 **LIST OF FIGURES**

315 **Fig. 1.** Scenario for the Covid-19 epidemic in a population of the size of the UK (66 million) as-  
316 suming no measures to stop the spread of the virus are taken. Shown are: cumulative (blue)  
317 and daily (red) cases (top row), cumulative and daily fatalities (2nd and 3rd row) and the  
318 reproduction factor  $R_0$  (magenta) and "effective reproduction factor"  $R_e$  (bottom). . . . . 19

319 **Fig. 2.** As Figure 1 for experiments A1, A2, B1, B2 (see Table 1 for details). Vertical lines show  
320 the timing when different measures were taken: **black dashed** - begin of measures (steps  
321 in the values of  $R_0$  (magenta) and  $R_e$  (blue)), **solid black** - Lockdown, **green dashed** - first  
322 and second easing of lockdown, **solid green** - 2nd lockdown. For the first wave the model is  
323 compared to the fatalities reported in the UK (**orange line**) and Germany (**green line**). . . . . 20

324 **Fig. 3.** As Figure 2 for experiments C1, C2, D1, D2 (see Table 1 for details). Vertical lines show  
325 the timing when different measures were taken: **black dashed** - begin of measures (steps  
326 in the values of  $R_0$  (magenta) and  $R_e$  (blue)), **solid black** - Lockdown, **green dashed**. For  
327 the first wave the model is compared to the fatalities reported in the UK (**orange line**) and  
328 Germany (**green line**). . . . . 21

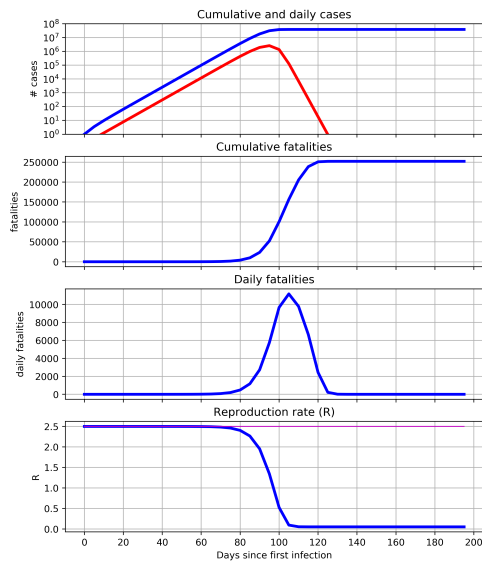

329 FIG. 1. Scenario for the Covid-19 epidemic in a population of the size of the UK (66 million) assuming no  
330 measures to stop the spread of the virus are taken. Shown are: cumulative (blue) and daily (red) cases (top  
331 row), cumulative and daily fatalities (2nd and 3rd row) and the reproduction factor  $R_0$  (magenta) and "effective  
332 reproduction factor"  $R_e$  (bottom).

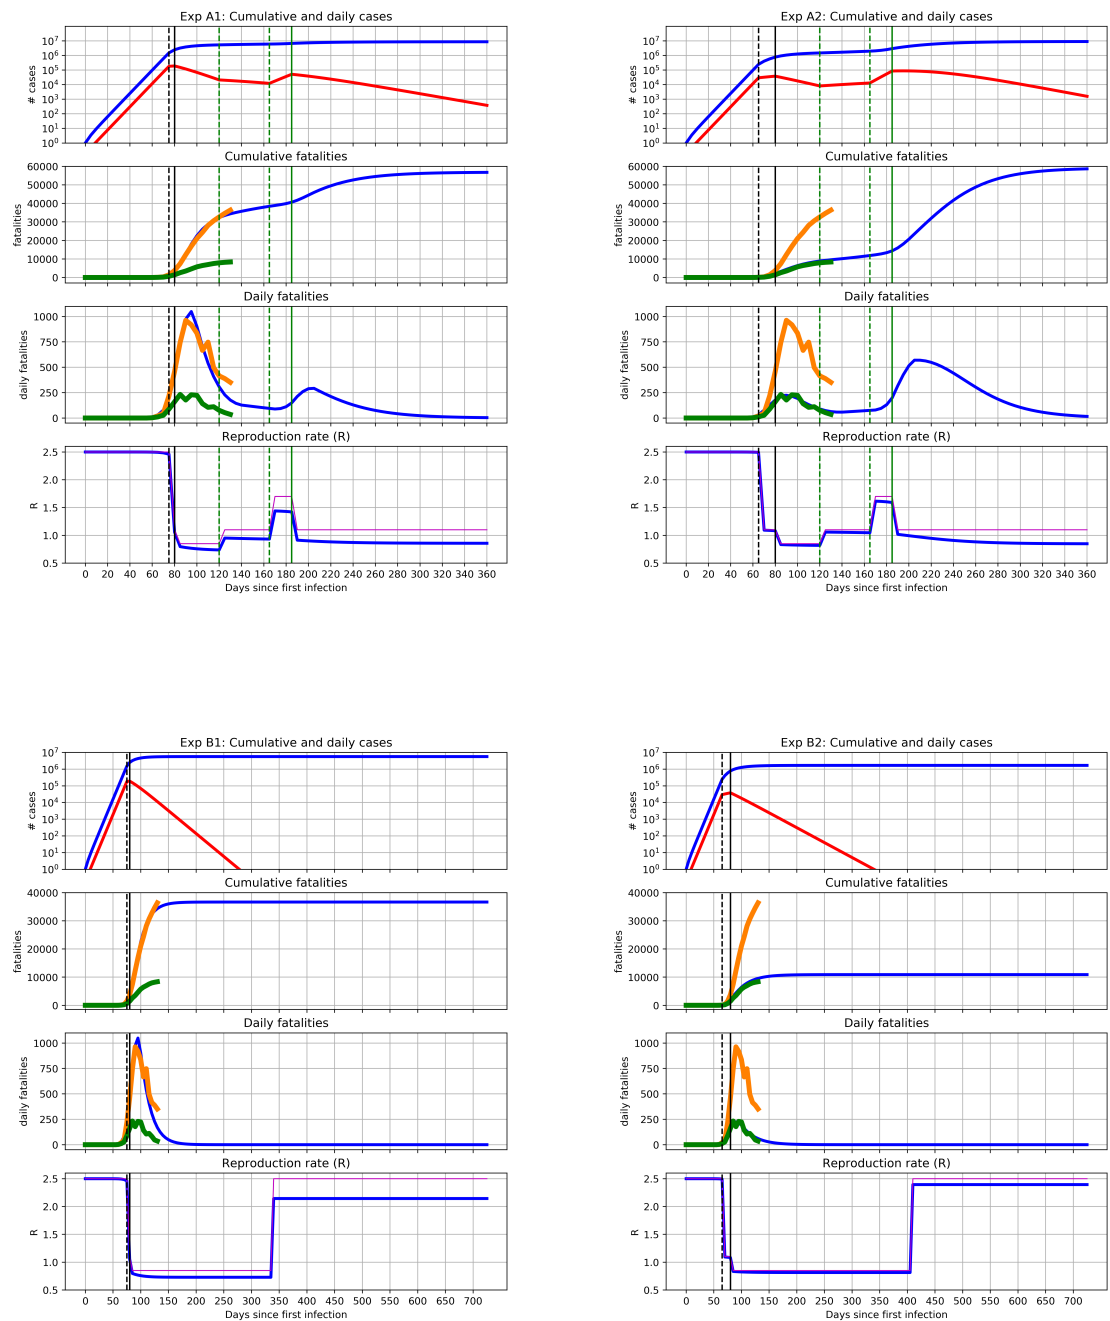

333 FIG. 2. As Figure 1 for experiments A1, A2, B1, B2 (see Table 1 for details). Vertical lines show the timing  
 334 when different measures were taken: **black dashed** - begin of measures (steps in the values of  $R_0$  (magenta)  
 335 and  $R_e$  (blue)), **solid black** - Lockdown, **green dashed** - first and second easing of lockdown, **solid green** -  
 336 2nd lockdown. For the first wave the model is compared to the fatalities reported in the UK (**orange line**) and  
 337 Germany (**green line**).

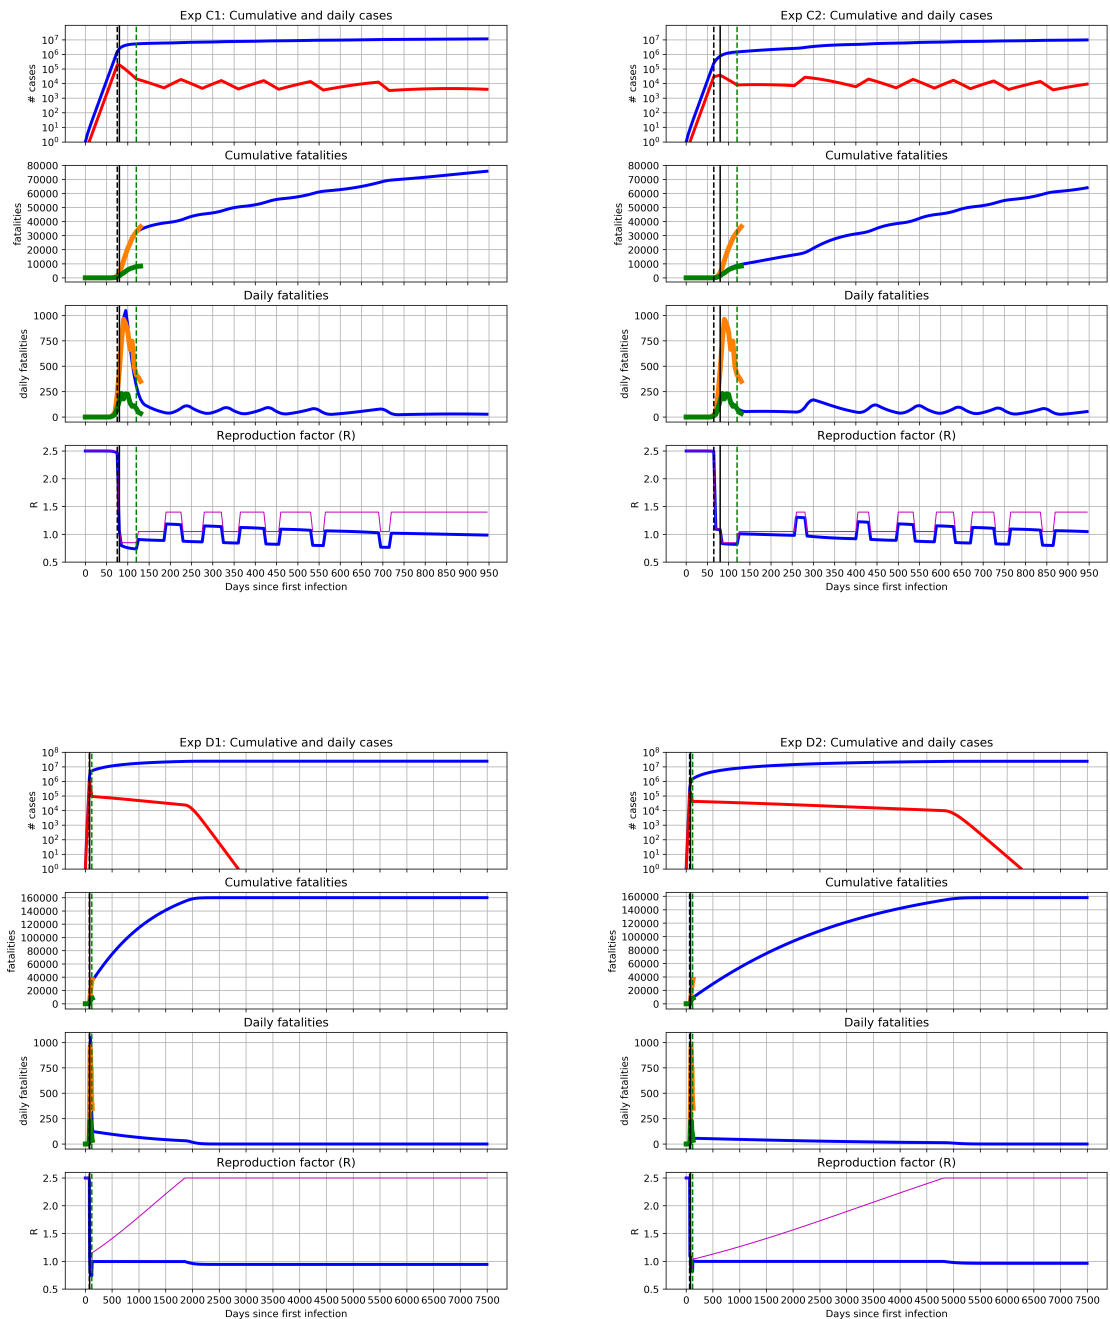

338 FIG. 3. As Figure 2 for experiments C1, C2, D1, D2 (see Table 1 for details). Vertical lines show the timing  
 339 when different measures were taken: **black dashed** - begin of measures (steps in the values of  $R_0$  (magenta) and  
 340  $R_e$  (blue)), **solid black** - Lockdown, **green dashed**. For the first wave the model is compared to the fatalities  
 341 reported in the UK (**orange line**) and Germany (**green line**).
